# Supplementary material
Source: PubMed Central journal article supplement (PMC7041580)
Supplement: JCM.01591-19-s0005.pdf [file JCM.01591-19-s0005.pdf]

## Supplementary tables

### ***Helicobacter pylori* infections in the Bronx, New York: Surveying Antibiotic Susceptibility and Strain Lineage by Whole-genome Sequencing**

Rajagopalan Saranathan<sup>1</sup>, Michael H. Levi<sup>2</sup>, Alice R. Wattam<sup>3</sup>, Adel Malek<sup>4</sup>, Emmanuel Asare<sup>1,2</sup>, Daniel S. Behin<sup>5</sup>, Debra H. Pan<sup>6</sup>, William R. Jacobs<sup>1\*</sup>, Wendy A. Szymczak<sup>2\*</sup>

<sup>1</sup> Department of Microbiology and Immunology, Albert Einstein College of Medicine, Bronx, NY

<sup>2</sup> Department of Pathology, Albert Einstein College of Medicine and Montefiore Medical Center, Bronx, NY

<sup>3</sup> Biocomplexity Institute and Initiative, University of Virginia, Charlottesville, VA, USA

<sup>4</sup> Provincial Public Health Laboratory, Eastern Health Microbiology Services, St. John's, New Foundland and Labrador, Canada

<sup>5</sup> Department of Medicine, Division of Gastroenterology, Albert Einstein College of Medicine and Montefiore Medical Center, Bronx, NY

<sup>6</sup> Department of Pediatrics, Division of Gastroenterology and Nutrition, Albert Einstein College of Medicine and Montefiore Medical Center, Bronx, NY

**Supplementary Table 1: Amino acid substitutions in PBPs among amoxicillin resistant isolates and loci of nearby putative amoxicillin binding motifs**

| Sl no | Isolate ID                                                                | Amino acid substitutions in PBPs – exclusively |                    |                                                 |
|-------|---------------------------------------------------------------------------|------------------------------------------------|--------------------|-------------------------------------------------|
|       |                                                                           | observed in resistant isolates                 |                    | Nearby motifs'                                  |
|       |                                                                           | Protein name                                   | Amino acid changes |                                                 |
| 1     | MHP11                                                                     | <b>Pbp1A</b>                                   | I259T              | SSN <sub>236-238</sub>                          |
|       |                                                                           | <b>Pbp2</b>                                    | None               | -                                               |
|       |                                                                           | <b>Pbp3</b>                                    | D2N                | -                                               |
|       |                                                                           |                                                | A50S               | -                                               |
|       |                                                                           |                                                | F490Y              | SARK <sub>497-500</sub>                         |
| A541T | KTG <sub>527-529</sub> , SYN <sub>543-545</sub> , SHGK <sub>568-572</sub> |                                                |                    |                                                 |
| 2     | MHP12                                                                     | <b>Pbp1A</b>                                   | None               | -                                               |
|       |                                                                           | <b>Pbp2</b>                                    | T498S              | KTG <sub>513-515</sub>                          |
|       |                                                                           | <b>Pbp3</b>                                    | None               | -                                               |
| 3     | MHP22                                                                     | <b>Pbp1A</b>                                   | N107R              | -                                               |
|       |                                                                           |                                                | A201V              | -                                               |
|       |                                                                           |                                                | V250I              | SSN <sub>236-238</sub>                          |
|       |                                                                           |                                                | S543T              | SSN <sub>560-562</sub>                          |
|       |                                                                           | <b>Pbp2</b>                                    | None               | -                                               |
|       |                                                                           | <b>Pbp3</b>                                    | V374I              | SSN <sub>382-384</sub> , SKN <sub>391-393</sub> |



|            |       | frxA mutations |   |    |    |    |    |    |    |    |    |    |    |    |     |     |     |     |     |     |     |     |     |     |     |     |                   |
|------------|-------|----------------|---|----|----|----|----|----|----|----|----|----|----|----|-----|-----|-----|-----|-----|-----|-----|-----|-----|-----|-----|-----|-------------------|
| 26695      |       | V              | V | A  | Q  | A  | P  | 1  | G  | R  | A  | F  | G  | A  | T   | N   | R   | I   | M   | N   | S   | A   | E   | E   | N   | C   | Nonsense mutation |
| Isolate ID | MIC   | 6              | 7 | 16 | 27 | 32 | 41 | 44 | 45 | 58 | 70 | 72 | 73 | 85 | 110 | 111 | 113 | 117 | 126 | 129 | 130 | 154 | 169 | 176 | 182 | 193 |                   |
| MHP08      | >256  |                |   |    | V  |    |    |    |    |    |    |    | S  |    |     |     |     |     |     |     |     |     | K   |     |     |     |                   |
| MHP09      | >256  | I              | I | T  | E  | V  |    |    |    |    |    | S  | S  |    |     | H   |     |     |     |     | T   | D   |     |     | D   | S   | 109 stop          |
| MHP10      | >256  |                | I | T  |    | V  |    | V  |    |    |    | S  | S  | V  |     | D   |     |     |     |     |     |     |     |     |     |     | S                 |
| MHP13      | >256  | I              | I | T  | E  | V  |    |    |    |    | G  | S  | S  |    |     | H   |     |     |     |     | T   | D   |     | K   |     | S   |                   |
| MHP16      | >256  |                | I |    |    |    |    |    |    |    |    |    |    |    |     | I   | G   |     |     |     |     |     |     |     |     |     | 109 stop          |
| MHP17      | >256  | I              | I | T  | E  | V  |    |    |    |    | G  | S  | S  |    |     | H   |     |     |     |     | T   | D   |     |     |     | S   |                   |
| MHP18      | >256  |                | I |    | E  | V  |    |    |    |    |    | S  | S  |    |     |     |     |     |     |     |     |     |     |     |     |     |                   |
| MHP20      | >256  |                | I |    |    |    |    |    |    |    |    |    |    |    |     |     |     |     |     |     |     |     | K   |     |     |     |                   |
| MHP28      | >256  | I              | I | T  | E  | V  |    |    |    |    | G  | S  | S  |    |     | H   |     |     |     |     | T   | D   |     |     |     | S   | 74 stop           |
| MHP32      | >256  | I              | I | T  | E  | V  |    |    |    |    | G  | S  | S  |    |     | H   |     |     |     |     | T   | D   |     |     |     | S   | 74 stop           |
| MHP34      | >256  | I              | I | T  | E  | V  |    |    |    |    | G  | S  | S  |    |     | H   |     |     |     |     | T   | D   |     | K   |     | S   | 74 stop           |
| MHP36      | >256  |                | I |    |    |    |    |    |    |    | C  |    |    | V  |     |     |     |     |     |     |     |     |     |     |     |     |                   |
| MHP37      | >256  | I              | I | T  |    |    |    |    |    |    |    |    |    |    |     |     |     |     |     |     |     |     |     |     |     |     |                   |
| MHP40      | >256  | I              | I | T  | E  | V  |    |    |    |    | G  | S  | S  |    | S   |     |     |     |     |     | T   | D   |     |     | D   | S   | 74 stop           |
| MHP44      | >256  | I              | I | T  | E  | V  |    |    |    |    | G  | S  | S  |    |     | H   |     |     | I   |     |     |     |     |     |     | S   | 74 stop           |
| MHP47      | >256  | I              | I | T  | E  | V  |    |    |    |    | G  | S  | S  |    |     | H   |     |     |     |     | T   | D   |     | K   |     | S   | 74 stop           |
| MHP50      | >256  | I              | I | T  | E  | V  |    |    |    |    | G  | S  | S  |    | S   |     |     |     | I   |     |     |     |     |     |     | S   | 74 stop           |
| MHP52      | >256  | I              | I | T  | E  | V  |    |    |    |    | G  | S  | S  |    | S   |     |     |     |     | I   |     |     |     |     |     |     | S                 |
| MHP54      | >256  | I              | I | T  | E  | V  |    |    |    |    | G  | S  | S  |    |     | H   |     |     |     |     | T   | D   |     |     |     | S   | 74 stop           |
| MHP01      | 0.38  | I              | I | T  | E  | V  |    |    |    |    | G  | S  | S  |    |     | H   |     |     |     |     | T   | D   |     |     | D   | S   | 74 stop           |
| MHP02      | 0.047 | I              | I | T  | E  | V  |    |    |    |    | G  | S  | S  |    |     | H   |     |     |     |     | T   | D   |     |     |     | S   |                   |
| MHP03      | 0.5   |                | I | T  |    | V  |    |    |    |    |    |    | S  |    |     | D   |     |     |     |     |     |     |     |     |     |     |                   |
| MHP04      | 0.19  |                | I |    | E  | V  |    |    |    |    |    |    | S  |    |     |     |     |     |     |     |     |     |     |     |     |     | 39 stop           |
| MHP05      | 0.032 | I              | I | T  | E  | V  |    |    |    |    | G  | S  | S  |    |     | H   |     |     |     |     | T   | D   |     | K   | D   | S   |                   |
| MHP06      | 0.25  | I              | I | T  | E  | V  |    |    |    |    | G  | S  | S  |    |     | H   |     |     |     |     | T   | D   |     | K   | D   | S   | 74 stop           |
| MHP11      | 0.75  | I              | I | T  | E  | V  |    |    |    |    |    |    | S  |    |     |     |     |     |     |     |     |     |     |     |     |     |                   |
| MHP12      | 0.75  | I              | I | T  | E  | V  |    |    |    |    | G  | S  | S  |    |     | H   |     |     |     |     | T   | D   |     | K   |     | S   | 39 stop           |
| MHP15      | 0.19  | I              | I | T  | E  | V  |    |    |    |    | G  | S  | S  |    |     | H   |     |     |     |     | T   | D   |     | K   |     | S   |                   |
| MHP19      | 0.5   | I              | I | T  |    |    |    |    |    |    |    |    |    |    |     |     |     |     |     |     |     | V   |     |     |     |     |                   |
| MHP22      | 0.125 | I              | I | T  | E  | V  |    |    |    |    | G  | S  | S  |    |     |     |     |     |     |     | T   | D   |     |     | D   | S   | 74 stop           |
| MHP23      | 0.016 | I              | I | T  | E  | V  |    |    |    |    | G  | S  | S  |    |     | H   |     |     |     |     | T   | D   |     |     |     | S   |                   |
| MHP29      | 0.064 | I              | I | T  |    |    |    |    |    |    |    |    |    |    | S   |     |     |     |     |     |     | T   | D   |     |     | D   | S                 |
| MHP30      | 0.125 |                |   |    |    |    |    |    |    |    |    |    |    |    |     |     |     |     |     |     |     |     |     |     |     |     |                   |
| MHP31      | 0.38  | I              | I | T  | E  | V  |    |    |    |    | G  | S  | S  |    |     | H   |     |     |     |     | T   | D   |     |     |     | S   | 74 stop           |
| MHP33      | 0.032 | I              | I | T  | E  | V  |    |    |    |    | G  | S  | S  |    |     | H   |     |     |     |     | T   | D   |     | K   |     | S   | 74 stop           |
| MHP35      | 0.125 | I              | I | T  | E  | V  |    |    |    |    | G  | S  | S  |    |     | H   |     |     |     |     | T   | D   |     |     |     | S   | 74 stop           |
| MHP38      | 0.094 | I              | I | T  |    |    |    |    |    |    |    |    |    |    |     |     |     |     |     |     |     |     |     |     |     |     |                   |
| MHP39      | 0.38  | I              | I | T  | E  | V  |    |    |    |    | G  | S  | S  |    |     | H   |     |     |     |     | T   | D   |     |     |     | S   |                   |
| MHP41      | 0.016 | I              | I | T  | E  | V  |    |    |    |    |    | S  | S  |    |     | H   |     |     |     | I   | T   | D   | T   | K   | D   | S   |                   |
| MHP42      | 0.032 | I              | I | T  | E  | V  |    |    |    |    | G  | S  | S  |    | S   | H   |     |     |     | I   |     |     |     |     | K   | D   | S                 |
| MHP43      | 0.016 | I              | I | T  | E  | V  |    |    |    | R  | G  | S  | S  |    |     | H   |     |     |     |     | T   | D   |     | K   |     | S   |                   |
| MHP51      | 0.19  |                |   |    |    |    | T  |    |    |    |    |    |    |    |     |     | M   |     | F   |     |     |     |     |     |     |     |                   |

\* Amino acid substitutions in *rdxA* and *frxA*, which are exclusively noticed in resistant isolates were highlighted in green

‡ Isolates with truncations in *rdxA* and *frxA* (nonsense codon substitutions) are highlighted in orange
